# Supplementary material for: Interplay of coordinative and supramolecular interactions in formation of a series of metal–organic complexes bearing diverse dimensionalities
Source: Royal Society of Chemistry journal article supplement (doi:10.1039/b822083b), 2009-01-01
Supplement: b822083b.pdf [file b822083b.pdf]

1  
2  
3  
4  
5  
6  
7  
8  
9  
10  
11  
12  
13  
14  
15  
16  
17  
18  
19  
20  
21  
22  
23  
24  
25  
26  
27  
28  
29  
30  
31  
32  
33  
34  
35  
36  
37  
38  
39  
40  
41  
42  
43  
44

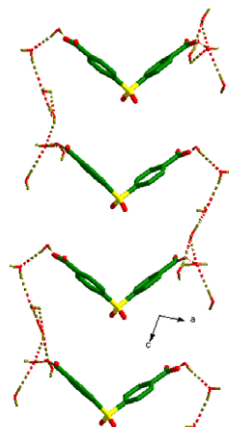

Fig. S1 Viewing of zigzag chain in compound 6.

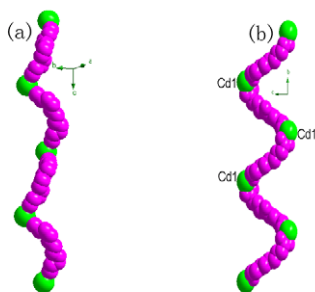

Fig. S2 Viewing of two helical chains in compound 11.

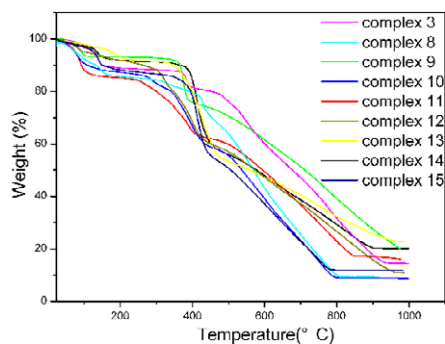

Fig. S3 TG curves of the complexes.

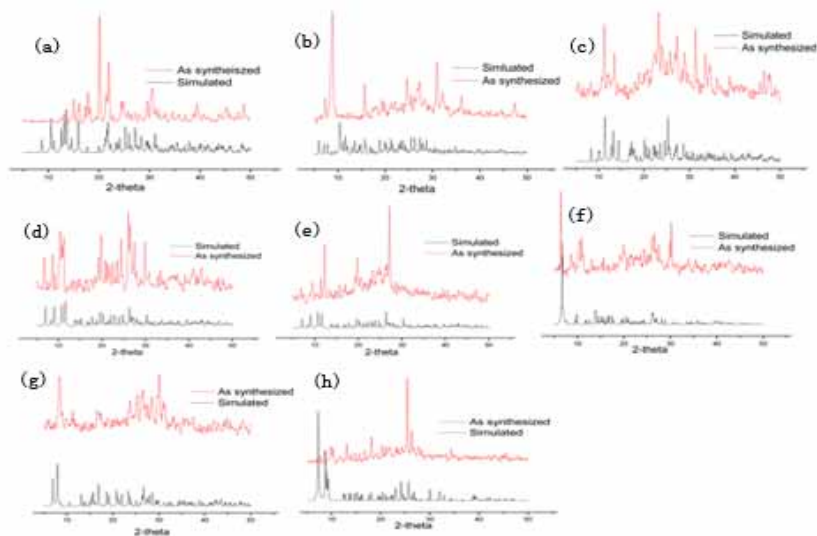

Fig.4S (a) Comparison of XRPD patterns of the simulated pattern from the single-crystal structure determination, the as-synthesized product in compound **4**. (b) in compound **6**. (c) in compound **7**. (d) in compound **9**. (e) in compound **10**. (f) in compound **12**. (g) in compound **13**. (h) in compound **14**.

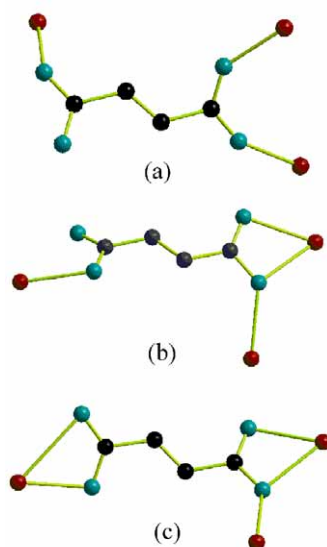

Scheme S1 The different coordinative modes of fum ligand in **8**, **9** and **10**.

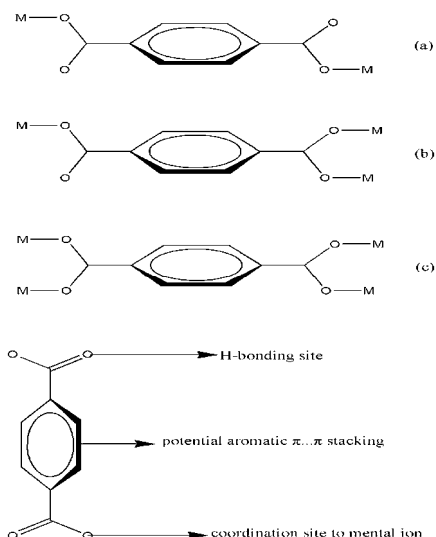

15 Scheme S2. The different coordinative modes of 1,4-BDC ligand in 13-15.

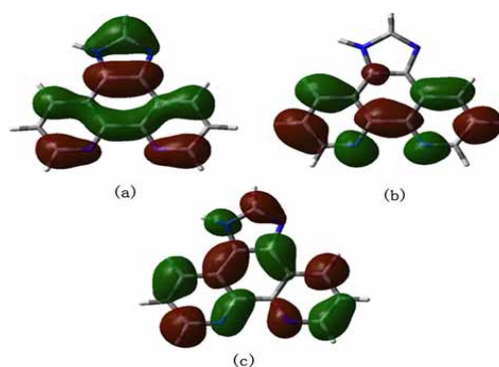

27  
28 Fig. S5 Sketch of the main molecular orbital involved in the dominant dipole-allowed  
29 transition for IP. obtained at the B3LYP/6-31G\* level of approximation.

30  
31  
32  
33  
34  
35 **Table S1. Selected bond distances (Å) and angles (°)**

36

| Complex 2                              |            |                 |            |
|----------------------------------------|------------|-----------------|------------|
| Zn(1)–O(4)                             | 2.101(3)   | Zn(1)–O(5)      | 2.095(2)   |
| Zn(1)–O(6)                             | 2.135(3)   | Zn(1)–N(1)      | 2.131(3)   |
| Zn(1)–N(2)                             | 2.152(3)   | Zn(1)–O(3)#1    | 2.099(2)   |
| O(4)–Zn(1)–O(5)                        | 92.39(10)  | O(4)–Zn(1)–O(6) | 173.70(10) |
| O(5)–Zn(1)–N(1)                        | 171.74(10) | O(5)–Zn(1)–N(2) | 94.15(10)  |
| O(3)#1–Zn(1)–N(2)                      | 168.61(10) |                 |            |
| Symmetry codes: #1: 2-x, 1/2+y, 1/2-z. |            |                 |            |

37  
38  
39  
40  
41  
42  
43  
44

|    |                                       |            |                   |            |
|----|---------------------------------------|------------|-------------------|------------|
| 1  | Complex 3                             |            |                   |            |
| 2  | Mn(1)–O(1)                            | 2.185(3)   | Mn(1)–O(2)        | 2.194(3)   |
| 3  | Mn(1)–O(3)                            | 2.140(3)   | Mn(1)–N(1)        | 2.247(4)   |
| 4  | Mn(1)–N(2)                            | 2.261(4)   | Mn(1)–O(6)#1      | 2.152(3)   |
| 5  | O(1)–Mn(1)–O(2)                       | 94.08(13)  | O(1)–Mn(1)–O(3)   | 174.25(13) |
| 6  | O(2)–Mn(1)–N(1)                       | 168.73(13) | O(2)–Mn(1)–N(2)   | 95.41(13)  |
| 7  | O(2)–Mn(1)–O(6)#1                     | 97.66(12)  | O(3)–Mn(1)–N(1)   | 88.43(14)  |
| 8  | O(3)–Mn(1)–N(2)                       | 96.05(13)  | O(3)–Mn(1)–O(6)#1 | 91.84(12)  |
| 9  | Symmetry codes: #1: 1-x,1/2+y,1/2-z ; |            |                   |            |
| 10 |                                       |            |                   |            |
| 11 | Complex 4                             |            |                   |            |
| 12 | Zn(1)–O(1)                            | 2.076(2)   | Zn(1)–O(2)        | 2.173(3)   |
| 13 | Zn(1)–O(3)                            | 2.090(3)   | Zn(1)–O(4)        | 2.092(2)   |
| 14 | Zn(1)–N(1)                            | 2.151(3)   | Zn(1)–N(4)        | 2.148(3)   |
| 15 | O(1)–Zn(1)–O(2)                       | 85.40(10)  | O(1)–Zn(1)–O(3)   | 86.89(10)  |
| 16 | O(1)–Zn(1)–O(4)                       | 98.65(9)   | O(1)–Zn(1)–N(1)   | 167.16(10) |
| 17 | O(1)–Zn(1)–N(4)                       | 93.45(10)  | O(2)–Zn(1)–O(3)   | 172.07(10) |
| 18 | O(4)–Zn(1)–N(1)                       | 92.47(10)  | O(4)–Zn(1)–N(4)   | 163.24(11) |
| 19 | Complex 5                             |            |                   |            |
| 20 | Co(1)–O(1)                            | 2.100(2)   | Co(1)–O(2)        | 2.067(2)   |
| 21 | Co(1)–O(3)                            | 2.147(2)   | Co(1)–O(4)        | 2.097(2)   |
| 22 | Co(1)–N(1)                            | 2.130(2)   | Co(1)–N(2)        | 2.140(2)   |
| 23 | O(1)–Co(1)–O(2)                       | 87.22(9)   | O(1)–Co(1)–O(3)   | 84.86(8)   |
| 24 | O(2)–Co(1)–O(4)                       | 92.80(10)  | O(1)–Co(1)–N(2)   | 167.69(9)  |
| 25 | O(1)–Co(1)–N(1)                       | 93.87(9)   | O(2)–Co(1)–O(3)   | 171.96(8)  |
| 26 | Complex 6                             |            |                   |            |
| 27 | Mn(1)–O(2)                            | 2.127(4)   | Mn(1)–O(5)        | 2.157(4)   |
| 28 | Mn(1)–N(1)                            | 2.270(5)   | Mn(1)–N(2)        | 2.251(5)   |
| 29 | Mn(1)–N(5)                            | 2.251(5)   | Mn(1)–N(6)        | 2.294(5)   |
| 30 | Mn(2)–O(1)                            | 2.102(4)   | Mn(2)–O(6)        | 2.198(4)   |
| 31 | Mn(2)–N(9)                            | 2.289(5)   | Mn(2)–N(10)       | 2.265(5)   |
| 32 | Mn(2)–N(13)                           | 2.287(5)   | Mn(2)–N(14)       | 2.263(5)   |
| 33 | O(2)–Mn(1)–N(2)                       | 94.91(18)  | O(2)–Mn(1)–N(5)   | 86.39(15)  |
| 34 | O(2)–Mn(1)–N(6)                       | 92.04(17)  | O(5)–Mn(1)–N(1)   | 86.98(16)  |
| 35 | O(5)–Mn(1)–N(2)                       | 105.51(16) | O(5)–Mn(1)–N(5)   | 89.93(16)  |
| 36 | O(5)–Mn(1)–N(6)                       | 160.71(16) | N(1)–Mn(1)–N(2)   | 73.43(19)  |
| 37 | O(6)–Mn(2)–N(13)                      | 160.63(16) | O(1)–Mn(2)–N(10)  | 161.02(15) |
| 38 | N(14)–Mn(2)–N(13)                     | 103.19(16) | N(14)–Mn(2)–N(9)  | 152.46(18) |
| 39 | Complex 7                             |            |                   |            |
| 40 | Mn(1)–O(1W)                           | 2.146(2)   | Mn(1)–N(1)        | 2.230(3)   |
| 41 | Mn(1)–N(2)                            | 2.280(3)   | Mn(1)–O(1W)#1     | 2.146(2)   |
| 42 | Mn(1)–N(1)#1                          | 2.230(3)   | Mn(1)–N(2)#1      | 2.280(3)   |
| 43 | Mn(2)–O(3)                            | 2.237(2)   | Mn(2)–N(3)        | 2.167(2)   |
| 44 | Mn(2)–O(1)#1                          | 2.233(2)   | Mn(2)–O(3)#1      | 2.237(2)   |

|   |                     |            |                    |            |
|---|---------------------|------------|--------------------|------------|
| 1 | Mn(2)–N(3)#1        | 2.167(2)   | Mn(2)–O(1)         | 2.233(2)   |
| 2 | O(1W)–Mn(1)–N(2)#1  | 162.97(9)  | N(1)–Mn(1)–N(2)    | 73.05(9)   |
| 3 | N(1)–Mn(1)–N(1)#1   | 159.55(14) | O(1W)#1–Mn(1)–N(2) | 162.97(9)  |
| 4 | N(1)#1–Mn(1)–N(2)   | 94.78(9)   | N(2)–Mn(1)–N(2)#1  | 108.16(10) |
| 5 | N(1)#1–Mn(1)–N(2)#1 | 73.05(9)   | N(3)–Mn(2)–N(3)#2  | 173.76(14) |
| 6 | O(3)–Mn(2)–O(3)#2   | 104.47(13) | N(3)–Mn(2)–O(3)#2  | 111.95(9)  |

7 Symmetry codes: #1: -x,y,1/2-z ; #2: 1-x,y,1/2-z

8 **Complex 8**

|    |                   |            |                   |            |
|----|-------------------|------------|-------------------|------------|
| 9  | Mn(1)–O(1)        | 2.216(3)   | Mn(1)–O(2)        | 2.113(4)   |
| 10 | Mn(1)–N(1)        | 2.338(4)   | Mn(1)–N(2)        | 2.294(4)   |
| 11 | Mn(1)–O(4)#1      | 2.173(4)   | Mn(1)–O(3)#2      | 2.106(3)   |
| 12 | O(1)–Mn(1)–N(2)   | 88.39(13)  | O(1)–Mn(1)–O(4)#1 | 174.53(13) |
| 13 | O(1)–Mn(1)–O(3)#2 | 92.12(14)  | O(2)–Mn(1)–N(1)   | 159.25(14) |
| 14 | O(2)–Mn(1)–N(2)   | 89.00(14)  | O(2)–Mn(1)–O(4)#1 | 85.58(13)  |
| 15 | O(2)–Mn(1)–O(3)#2 | 110.59(15) | N(1)–Mn(1)–N(2)   | 71.03(14)  |

16 Symmetry codes: #1: 1+x,y,z ; #2: 1-x,-y,-z ;

17

18 **Complex 9**

|    |                    |           |                    |            |
|----|--------------------|-----------|--------------------|------------|
| 19 | Cd(1)–O(1)         | 2.262(4)  | Cd(1)–O(3)         | 2.271(5)   |
| 20 | Cd(1)–O(4)         | 2.580(6)  | Cd(1)–N(1)         | 2.363(5)   |
| 21 | Cd(1)–N(2)         | 2.332(5)  | Cd(1)–O(11)#1      | 2.309(4)   |
| 22 | Cd(2)–O(6)         | 2.339(5)  | Cd(2)–O(11)        | 2.342(4)   |
| 23 | Cd(2)–N(5)         | 2.288(6)  | Cd(2)–O(6)#2       | 2.339(5)   |
| 24 | Cd(2)–O(11)#2      | 2.342(4)  | Cd(2)–N(5)#2       | 2.286(6)   |
| 25 | O(1)–Cd(1)–O(3)    | 125.1(2)  | O(1)–Cd(1)–O(4)    | 175.95(19) |
| 26 | N(1)–Cd(1)–N(2)    | 71.1 (2)  | O(11)#1–Cd(1)–N(1) | 161.40(17) |
| 27 | O(11)#1–Cd(1)–N(2) | 90.42(18) | O(6)–Cd(2)–O(11)   | 55.69(15)  |
| 28 | O(6)–Cd(2)–N(5)    | 88.64(18) | O(6)–Cd(2)–O(6)#2  | 170.9(2)   |

29 Symmetry codes: #1: 1-x,y,3/2-z. #2: -x,y,3/2-z

30

**Complex 10**

|    |                   |          |                   |           |
|----|-------------------|----------|-------------------|-----------|
| 31 | Zn(1)–O(1)        | 2.345(8) | Zn(1)–O(6)        | 2.251(9)  |
| 32 | Zn(1)–N(1)        | 2.310(6) | Zn(1)–N(2)        | 2.322(6)  |
| 33 | Zn(1)–O(3)#1      | 2.272(9) | Zn(2)–O(1)        | 2.299(8)  |
| 34 | Zn(2)–O(2)        | 2.317(8) | Zn(2)–N(5)        | 2.306(11) |
| 35 | O(3)#1–Zn(1)–O(6) | 125.7(4) | N(1)–Zn(1)–N(2)   | 71.6(3)   |
| 36 | O(1)–Zn(2)–N(5)   | 143.2(4) | O(1)–Zn(2)–O(2)#2 | 119.0(3)  |
| 37 | N(5)#2–Zn(2)–O(2) | 97.8(4)  | O(2)–Zn(2)–O(2)#2 | 173.2(4)  |

38 Symmetry codes: #1: 1-x,y,1/2-z. #2: 2-x,y,1/2-z

39

40 **Complex 11**

|    |             |          |              |          |
|----|-------------|----------|--------------|----------|
| 41 | Cd(1)–O(5)  | 2.438(5) | Cd(1)–O(6)   | 2.315(6) |
| 42 | Cd(1)–O(11) | 2.284(6) | Cd(1)–N(1)   | 2.315(6) |
| 43 | Cd(1)–N(2)  | 2.301(6) | Cd(1)–O(2)#3 | 2.245(5) |
| 44 | Cd(2)–O(4)  | 2.256(5) | Cd(2)–N(3)   | 2.367(6) |

|    |                                                                          |           |                    |            |
|----|--------------------------------------------------------------------------|-----------|--------------------|------------|
| 1  | Cd(2)–N(4)                                                               | 2.342(6)  | Cd(2)–O(12)#1      | 2.291(5)   |
| 2  | Cd(2)–O(9)#2                                                             | 2.234(5)  |                    |            |
| 3  | O(6)–Cd(1)–N(1)                                                          | 132.6(2)  | O(6)–Cd(1)–N(2)    | 97.81(19)  |
| 4  | O(2)#3–Cd(1)–O(6)                                                        | 110.8(2)  | O(11)–Cd(1)–N(1)   | 137.9(2)   |
| 5  | O(4)–Cd(2)–N(4)                                                          | 160.4(2)  | O(4)–Cd(2)–O(12)#1 | 88.56(19)  |
| 6  | O(4)–Cd(2)–O(9)#2                                                        | 103.4(2)  | N(3)–Cd(2)–N(4)    | 70.3(2)    |
| 7  | O(12)#1–Cd(2)–N(3)                                                       | 91.71(19) | O(9)#2–Cd(2)–N(3)  | 164.0(2)   |
| 8  | Symmetry codes: #1: 2-x,1-y,-z; #2: x,1-y,-1/2+z ; #3: 3/2-x,1/2+y,1/2-z |           |                    |            |
| 9  | <b>Complex 12</b>                                                        |           |                    |            |
| 10 | Zn(1)–O(4)                                                               | 2.196(13) | Zn(1)–O(11)        | 2.295(14)  |
| 11 | Zn(1)–N(5)                                                               | 2.358(15) | Zn(1)–O(8)#1       | 2.355(13)  |
| 12 | Zn(1)–O(9)#1                                                             | 2.410(12) | Zn(2)–O(1)         | 2.239(11)  |
| 13 | Zn(2)–O(10)                                                              | 2.320(12) | Zn(2)–N(1)         | 2.390(13)  |
| 14 | Zn(2)–N(2)                                                               | 2.358(19) | Zn(2)–O(6)#2       | 2.249(11)  |
| 15 | Zn(1)–N(6)                                                               | 2.337(15) | O(4)–Zn(1)–N(5)    | 149.2(6)   |
| 16 | O(4)–Zn(1)–O(8)#1                                                        | 111.7(5)  | O(4)–Zn(1)–O(9)#1  | 85.5(5)    |
| 17 | O(1)–Zn(2)–O(10)                                                         | 80.6(4)   | O(1)–Zn(2)–N(1)    | 161.2(5)   |
| 18 | O(6)#2–Zn(2)–N(2)                                                        | 160.2(6)  | O(6)#2–Zn(2)–O(1)  | 104.6(5)   |
| 19 | Symmetry codes: #1: 3/2-x,1/2+y,1/2-z ; #2: x,-y,-1/2+z.                 |           |                    |            |
| 20 |                                                                          |           |                    |            |
| 21 | <b>Complex 13</b>                                                        |           |                    |            |
| 22 | Cd(1)–O(1)                                                               | 2.025(9)  | Cd(1)–O(2W)        | 2.084(8)   |
| 23 | Cd(1)–N(1)                                                               | 2.173(10) | Cd(1)–N(2)         | 2.098(10)  |
| 24 | Cd(1)–O(3)#1                                                             | 2.112(9)  |                    |            |
| 25 | O(1)–Cd(1)–N(2)                                                          | 152.5(4)  | O(2W)–Cd(1)–O(3)#1 | 91.3(4)    |
| 26 | O(2W)–Cd(1)–N(2)                                                         | 92.7(3)   | O(2W)–Cd(1)–N(1)   | 170.4(4)   |
| 27 | Symmetry codes: #1: 1/2-x,1/2+y,1-z.                                     |           |                    |            |
| 28 | <b>Complex 14</b>                                                        |           |                    |            |
| 29 | Mn(1)–O(1)                                                               | 2.345(9)  | Mn(1)–O(2)         | 2.467(9)   |
| 30 | Mn(1)–O(1W)                                                              | 2.209(11) | Mn(1)–N(1)         | 2.256(12)  |
| 31 | Mn(1)–N(2)                                                               | 2.322(13) | Mn(1)–O(3)#1       | 2.466(10)  |
| 32 | Mn(1)–O(4)#1                                                             | 2.283(9)  |                    |            |
| 33 | O(1W)–Mn(1)–N(1)                                                         | 168.0(4)  | O(1)–Mn(1)–O(3)    | 139.8(4)   |
| 34 | O(2)–Mn(1)–N(2)                                                          | 85.0(3)   | O(4)–Mn(1)–N(2)#1  | 132.2(3)   |
| 35 | O(2)–Mn(1)–O(4)#1                                                        | 141.1(4)  | O(2)–Mn(1)–O(3)    | 163.9(4)   |
| 36 | Symmetry codes: #1: -1/2+x,1/2-y,-1/2+z .                                |           |                    |            |
| 37 | <b>Complex 15</b>                                                        |           |                    |            |
| 38 | Zn(1)–O(1)                                                               | 2.040(4)  | Zn(1)–O(3)         | 2.055(5)   |
| 39 | Zn(1)–N(1)#1                                                             | 2.119(5)  | Zn(1)–N(2)#1       | 2.123(6)   |
| 40 | Zn(1)–O(2)#2                                                             | 2.028(4)  | Zn(2)–O(4)         | 1.974(5)   |
| 41 | Zn(2)–O(5)                                                               | 1.924(5)  | Zn(2)–O(7)         | 1.925(5)   |
| 42 | Zn(2)–N(3)                                                               | 2.013(5)  |                    |            |
| 43 | O(1)–Zn(1)–O(3)                                                          | 85.88(19) | O(1)–Zn(1)–N(1)#1  | 151.16(19) |
| 44 | O(1)–Zn(1)–N(2)#1                                                        | 98.7(2)   | O(1)–Zn(1)–O(2)#2  | 103.30(17) |

|   |                                               |          |                   |          |
|---|-----------------------------------------------|----------|-------------------|----------|
| 1 | O(3)–Zn(1)–N(1)#1                             | 94.3(2)  | O(3)–Zn(1)–N(2)#1 | 170.0(2) |
| 2 | O(4)–Zn(2)–O(5)                               | 101.5(2) | O(5)–Zn(2)–O(7)   | 134.8(2) |
| 3 | Symmetry codes: #1: 1+x,y,z; #2: 2-x,2-y,1-z. |          |                   |          |

4

5 **Table S2. Hydrogen Bond Parameters in the Crystal Structures of compounds**

| 6  | Compounds | D–H···A                                                                                                                         | D···A(Å)  | H···A(Å)  | D–H···A(deg) |
|----|-----------|---------------------------------------------------------------------------------------------------------------------------------|-----------|-----------|--------------|
| 7  | <b>1</b>  | O4–H4WA···O1 <sup>a</sup>                                                                                                       | 2.683(7)  | 2.15      | 123.00       |
| 8  |           | O5–H5WB···N1 <sup>b</sup>                                                                                                       | 2.731(6)  | 1.91      | 176.00       |
| 9  |           | O7–H4WA···O3 <sup>a</sup>                                                                                                       | 2.682(6)  | 1.91      | 156.00       |
| 10 |           | N4–H4···O6 <sup>a</sup>                                                                                                         | 2.761(7)  | 1.83(6)   | 159(5)       |
| 11 |           | O9–H9W···O2 <sup>d</sup>                                                                                                        | 2.745(6)  | 1.93      | 170.00       |
| 12 |           | O6–H6WB···O10 <sup>e</sup>                                                                                                      | 2.723(10) | 1.96(5)   | 152(7)       |
| 13 |           | O7–H7WB···O2 <sup>d</sup>                                                                                                       | 2.876(7)  | 2.05(3)   | 171(4)       |
| 14 |           | O10–H11A···O1 <sup>f</sup>                                                                                                      | 2.862(9)  | 2.24(14)  | 131(15)      |
| 15 |           | <sup>a</sup> –1+x,y,z; <sup>b</sup> 1–x,–y,1–z; <sup>c</sup> –x,1–y,1–z; <sup>d</sup> 1–x,1–y,–z; <sup>e</sup> x,1+y,–1+z;      |           |           |              |
| 16 |           | <sup>f</sup> 1–x,1–y,1–z.                                                                                                       |           |           |              |
| 17 | <b>3</b>  | O1–H1B···N4 <sup>a</sup>                                                                                                        | 2.739(5)  | 1.942(4)  | 159(5)       |
| 18 |           | O1–H1C···O5 <sup>b</sup>                                                                                                        | 2.745(4)  | 2.01(6)   | 146(6)       |
| 19 |           | O1–H2B···O6 <sup>c</sup>                                                                                                        | 2.946(5)  | 2.15(3)   | 159.00       |
| 20 |           | N3–H3A···O4 <sup>d</sup>                                                                                                        | 2.782(5)  | 1.93      | 168.00       |
| 21 |           | <sup>a</sup> –x, 2–y,–z; <sup>b</sup> 1–x, 1/2+y,1/2–z; <sup>c</sup> x,1+y,z; <sup>d</sup> –1+x,y,z.                            |           |           |              |
| 22 | <b>4</b>  | O1–H2C···N2 <sup>a</sup>                                                                                                        | 1.980(4)  | 2.00(5)   | 163(6)       |
| 23 |           | N3–H3···O5 <sup>b</sup>                                                                                                         | 2.878(4)  | 2.04      | 164.00       |
| 24 |           | O3–H3B···O6 <sup>c</sup>                                                                                                        | 2.686(4)  | 1.93(4)   | 152(4)       |
| 25 |           | O3–H3C···O7 <sup>d</sup>                                                                                                        | 2.634(4)  | 1.79      | 170(5)       |
| 26 |           | O7–H7B···O5 <sup>c</sup>                                                                                                        | 2.804(4)  | 1.98(3)   | 162(4)       |
| 27 |           | O7–H7C···O6 <sup>e</sup>                                                                                                        | 2.836(4)  | 1.99(2)   | 174(4)       |
| 28 |           | <sup>a</sup> 2–x,–y,–z; <sup>b</sup> 1+x,1/2–y, <sup>c</sup> 1–x,1–y,–z; <sup>d</sup> x,–1+y,z; <sup>e</sup> x,3/2–y,1/2+z;     |           |           |              |
| 29 |           | <sup>f</sup> 1+x,1/2–y,1/2+z                                                                                                    |           |           |              |
| 30 | <b>5</b>  | O3–H2B···N3 <sup>a</sup>                                                                                                        | 2.806(3)  | 2.03      | 154(4)       |
| 31 |           | O2–H3B···O7 <sup>b</sup>                                                                                                        | 2.636(4)  | 1.82(3)   | 173(4)       |
| 32 |           | O3–H3C···O6 <sup>c</sup>                                                                                                        | 2.693(3)  | 1.96(4)   | 149(4)       |
| 33 |           | N4–H4A···O5 <sup>d</sup>                                                                                                        | 2.878(3)  | 2.09(3)   | 164(3)       |
| 34 |           | O7–H7B···O6 <sup>e</sup>                                                                                                        | 2.829(4)  | 2.01(3)   | 174(5)       |
| 35 |           | O7–H7C···O5 <sup>c</sup>                                                                                                        | 2.800(3)  | 2.021(18) | 167(3)       |
| 36 |           | <sup>a</sup> 1–x,–y,–z; <sup>b</sup> x,–1+y,z; <sup>c</sup> –x,1–y,–z; <sup>d</sup> 1+x,1/2–y,1/2+z; <sup>e</sup> x,3/2–y,1/2+z |           |           |              |
| 37 | <b>6</b>  | N4–H4c···O7 <sup>a</sup>                                                                                                        | 2.733(7)  | 1.93      | 154.00       |
| 38 |           | N8–H8A···O13 <sup>b</sup>                                                                                                       | 2.949(7)  | 2.09      | 175.00       |
| 39 |           | N11–H11B···O10 <sup>a</sup>                                                                                                     | 2.681(7)  | 1.90      | 151.00       |
| 40 |           | N15–H15A···O15 <sup>c</sup>                                                                                                     | 2.808(7)  | 2.02      | 152.00       |
| 41 |           | O5–H5A···O3                                                                                                                     | 2.698(5)  | 1.89      | 157.00       |
| 42 |           | O6–H6A···O4                                                                                                                     | 2.697(6)  | 1.9000    | 160.00       |
| 43 |           | O5–H5B···O7 <sup>d</sup>                                                                                                        | 2.649(6)  | 1.82      | 176.00       |
| 44 |           | O15–H15D···N7 <sup>b</sup>                                                                                                      | 2.756(7)  | 2.1600    | 124.00       |

|    |           |                                                                                                                                                   |           |          |
|----|-----------|---------------------------------------------------------------------------------------------------------------------------------------------------|-----------|----------|
| 1  |           | <sup>a</sup> $-1/2+x, 1/2-y, -1/2+z$ ; <sup>b</sup> $-x, 1-y, 1-z$ ; <sup>c</sup> $1/2-x, -1/2+y, 1/2-z$ ;                                        |           |          |
| 2  |           | <sup>d</sup> $1/2-x, 1/2+y, 1/2-z$ .                                                                                                              |           |          |
| 3  | <b>7</b>  | O1W-H1W...O1W <sup>a</sup>                                                                                                                        | 2.710(3)  | 1.86(3)  |
| 4  |           | O2W-H4W...O1W <sup>b</sup>                                                                                                                        | 2.969(4)  | 2.15(3)  |
| 5  |           | N5-H5A...O2 <sup>c</sup>                                                                                                                          | 2.751(4)  | 1.92(2)  |
| 6  |           | O3W-H5W...N4 <sup>d</sup>                                                                                                                         | 2.834(4)  | 1.95(3)  |
| 7  |           | O3W-H6W...O3 <sup>a</sup>                                                                                                                         | 2.828(4)  | 1.98(3)  |
| 8  |           | O2W-H6W...O4 <sup>a</sup>                                                                                                                         | 2.710(3)  | 1.86(3)  |
| 9  |           | <sup>a</sup> $1-x, y, 1/2-z$ ; <sup>b</sup> $1/2-x, 1/2+y, 1/2-z$ ; <sup>c</sup> $x, -y, 1/2+z$ ;                                                 |           |          |
| 10 |           | <sup>d</sup> $1/2+x, 1/2-y, -1/2+z$ .                                                                                                             |           |          |
| 11 | <b>8</b>  | O1-H1B...N4 <sup>a</sup>                                                                                                                          | 2.793(7)  | 2.06(8)  |
| 12 |           | O1-H1C...O6 <sup>b</sup>                                                                                                                          | 2.771(8)  | 1.98(5)  |
| 13 |           | O6-H6W...O2 <sup>c</sup>                                                                                                                          | 3.028(7)  | 2.37(15) |
| 14 |           | O6-H6W...O4 <sup>d</sup>                                                                                                                          | 2.856(7)  | 2.19(14) |
| 15 |           | N3-H3B...O4 <sup>e</sup>                                                                                                                          | 3.266(6)  | 2.56     |
| 16 |           | N3-H3B...O5 <sup>e</sup>                                                                                                                          | 2.801(7)  | 1.97     |
| 17 |           | O9-H9...O5 <sup>e</sup>                                                                                                                           | 3.293(7)  | 2.42     |
| 18 |           | <sup>a</sup> $2-x, -y, 1-z$ ; <sup>b</sup> $x, -1+y, z$ ; <sup>c</sup> $1-x, 1-y, -z$ ; <sup>d</sup> $-x, 1-y, -z$ ; <sup>e</sup> $1-x, 1-y, 1-z$ |           |          |
| 19 | <b>9</b>  | O1W-H2W...N6 <sup>a</sup>                                                                                                                         | 2.774(8)  | 1.96     |
| 20 |           | N4-H4...O3W <sup>b</sup>                                                                                                                          | 2.932(7)  | 2.10     |
| 21 |           | N6-H6...O1W <sup>c</sup>                                                                                                                          | 2.774(8)  | 1.92     |
| 22 |           | <sup>a</sup> $1+x, 1+y, z$ ; <sup>b</sup> $1/2+x, 1/2-y, 1/2+z$ ; <sup>c</sup> $-1+x, -1+y, z$ .                                                  |           |          |
| 23 | <b>10</b> | O1W-H1A...O6 <sup>a</sup>                                                                                                                         | 2.685(2)  | 1.91     |
| 24 |           | O3W-H3D...N4 <sup>a</sup>                                                                                                                         | 2.742(6)  | 1.96     |
| 25 |           | N6-H6...O2W <sup>b</sup>                                                                                                                          | 2.794(5)  | 1.94     |
| 26 |           | <sup>a</sup> $x, y, 1+z$ ; <sup>b</sup> $1+x, y, z$ .                                                                                             |           |          |
| 27 | <b>11</b> | N5-H5A...O1 <sup>a</sup>                                                                                                                          | 2.835(9)  | 1.98     |
| 28 |           | N7-H7A...O16 <sup>b</sup>                                                                                                                         | 2.760(3)  | 1.90     |
| 29 |           | O11-H11A...O6 <sup>c</sup>                                                                                                                        | 2.732(8)  | 1.93     |
| 30 |           | O11-H11B...O8 <sup>d</sup>                                                                                                                        | 2.744(8)  | 1.94     |
| 31 |           | O12-H12A...O1 <sup>e</sup>                                                                                                                        | 2.847(8)  | 2.05     |
| 32 |           | O15-H15B...O2 <sup>d</sup>                                                                                                                        | 2.891(6)  | 2.16     |
| 33 |           | <sup>a</sup> $1/2+x, 3/2-y, -1/2+z$ ; <sup>b</sup> $x, 1+y, -1+z$ ; <sup>c</sup> $3/2-x, 3/2-y, -z$ ;                                             |           |          |
| 34 |           | <sup>d</sup> $3/2-x, 1/2+y, 1/2-z$ ; <sup>e</sup> $x, 1-y, -1/2+z$ .                                                                              |           |          |
| 35 | <b>12</b> | N4-H4A...O3 <sup>a</sup>                                                                                                                          | 2.85(2)   | 1.99     |
| 36 |           | N8-H8A...O12 <sup>b</sup>                                                                                                                         | 2.86(2)   | 2.01     |
| 37 |           | O10-H10C...O3 <sup>c</sup>                                                                                                                        | 2.856(18) | 2.06     |
| 38 |           | O10-H10D...O6 <sup>d</sup>                                                                                                                        | 2.696(17) | 1.90     |
| 39 |           | O11-H11D...O8 <sup>e</sup>                                                                                                                        | 2.683(19) | 1.88     |
| 40 |           | O12-H12C...O2 <sup>a</sup>                                                                                                                        | 2.75(2)   | 1.95     |
| 41 |           | O12-H12D...N8 <sup>f</sup>                                                                                                                        | 2.87(3)   | 2.53     |
| 42 |           | O12-H12D...O5 <sup>g</sup>                                                                                                                        | 2.83(2)   | 2.40     |
| 43 |           | O13-H13C...O14 <sup>h</sup>                                                                                                                       | 2.88(5)   | 2.08     |
| 44 |           | O13-H13D...O13 <sup>i</sup>                                                                                                                       | 2.30(5)   | 1.75     |



|    |           |                                                                                                                             |
|----|-----------|-----------------------------------------------------------------------------------------------------------------------------|
| 1  |           | <sup>a</sup> $-1/2+x, 1/2+y, z$ ; <sup>b</sup> $1+x, -1+y, z$ ; <sup>c</sup> $1-x, -y, -z$ ; <sup>d</sup> $1-x, y, 1/2-z$ ; |
| 2  |           | <sup>e</sup> $x, -y, -1/2+z$ ; <sup>f</sup> $-1+x, 1+y, z$ ; <sup>g</sup> $-1/2+x, 1/2-y, -1/2+z$ ;                         |
| 3  |           | <sup>h</sup> $1+x, y, z$ ; <sup>i</sup> $2-x, y, 1/2-z$ ; <sup>j</sup> $1/2+x, -1/2-y, -1/2+z$                              |
| 4  | <b>13</b> | O2W-H2C...O2      2.607(7)      1.90      147.65                                                                            |
| 5  |           | O2W-H2D...O3 <sup>a</sup> 2.747(10)      1.95      179.63                                                                   |
| 6  |           | N4-H4A...O4 <sup>b</sup> 2.720(11)      1.86      173.20                                                                    |
| 7  |           | O1W-H1C...N3 <sup>c</sup> 2.91(2)      2.08      173.96                                                                     |
| 8  |           | <sup>a</sup> $x, y, 1+z$ ; <sup>b</sup> $-1/2+x, 1/2-y, -z$ ; <sup>c</sup> $-1/2+x, 1/2-y, -z$ .                            |
| 9  | <b>14</b> | N4-H4A...O2 <sup>a</sup> 2.646(18)      1.84      156.00                                                                    |
| 10 |           | O11-H11C...O4 <sup>b</sup> 2.760(17)      2.16      131.00                                                                  |
| 11 |           | O12-H12D...N3 <sup>c</sup> 2.93(2)      2.13      177.00                                                                    |
| 12 |           | <sup>a</sup> $-x, -y, -z$ ; <sup>b</sup> $-x, y, 1/2-z$ ; <sup>c</sup> $1/2-x, 1/2-y, -z$                                   |
| 13 | <b>15</b> | O1W-H1W...O6 <sup>a</sup> 2.970(11)      2.128      175.79                                                                  |
| 14 |           | N4-H4...O1W <sup>b</sup> 2.845(11)      2.02      161.71                                                                    |
| 15 |           | O3W-H6W...O2W <sup>c</sup> 2.663(19)      2.20      112.72                                                                  |
| 16 |           | <sup>a</sup> $2-x, 1-y, 2-z$ ; <sup>b</sup> $x, 1+y, z$ ; <sup>c</sup> $2-x, 1-y, 1-z$ .                                    |
| 17 |           |                                                                                                                             |

18 Table S3 Main calculated optical transitions for IP

| Band | Excitation energy | $f^a$  | Transition character <sup>b</sup> | Transition feature      |
|------|-------------------|--------|-----------------------------------|-------------------------|
| 1    | 3.87              | 0.0091 | HOMO→LUMO (0.85582)               | $\pi \rightarrow \pi^*$ |
| 2    | 4.02              | 0.0000 | HOMO-2→LUMO (0.91409)             | $\pi \rightarrow \pi^*$ |
| 3    | 4.15              | 0.0330 | HOMO-1→LUMO (0.28047)             | $\pi \rightarrow \pi^*$ |
|      |                   |        | HOMO→LUMO+1 (0.65181)             |                         |

19 <sup>a</sup> Oscillator strengths.

20 <sup>b</sup> The proportion of the main transition are given in parenthesis.

21

22
